# Supplementary material
Source: publisher figshare collection journal article supplement (https://tandf.figshare.com/articles/dataset/_/3203377)
Supplement: Supplementary file 1 [file 1]

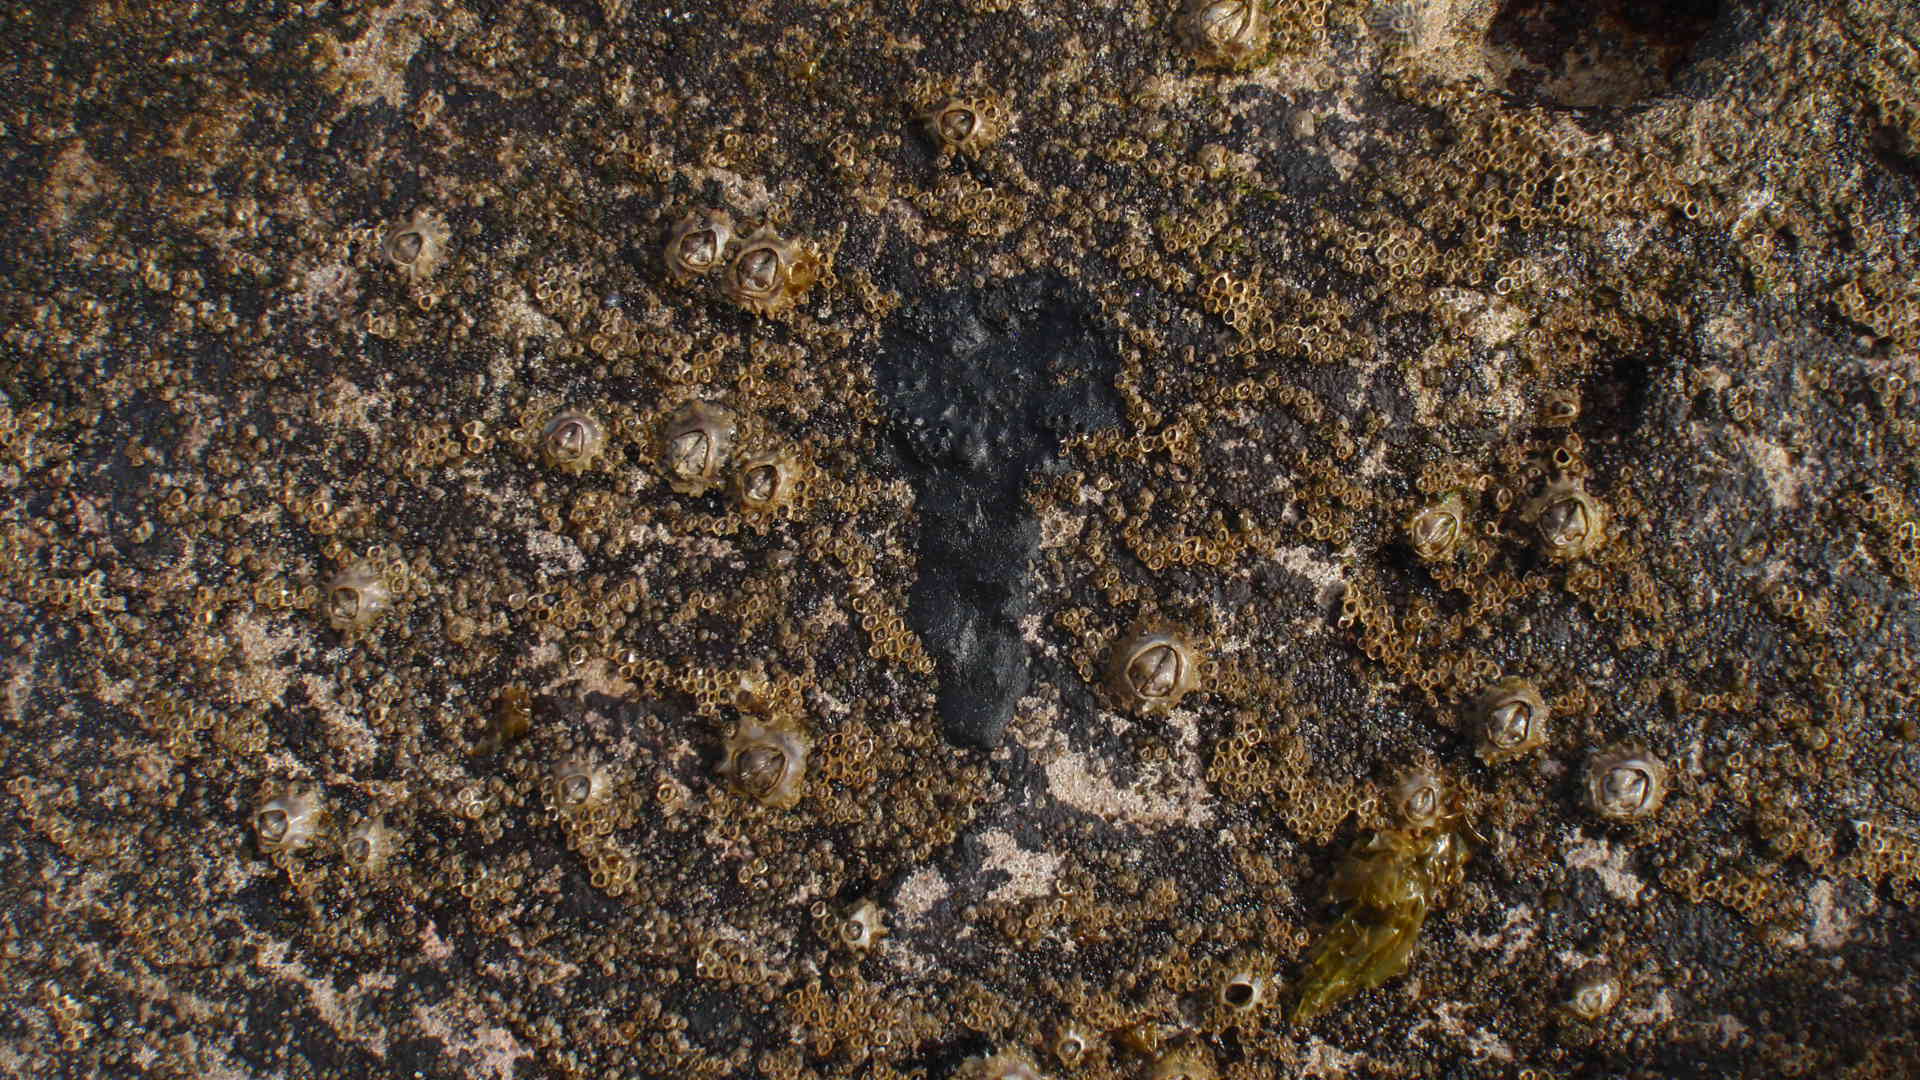

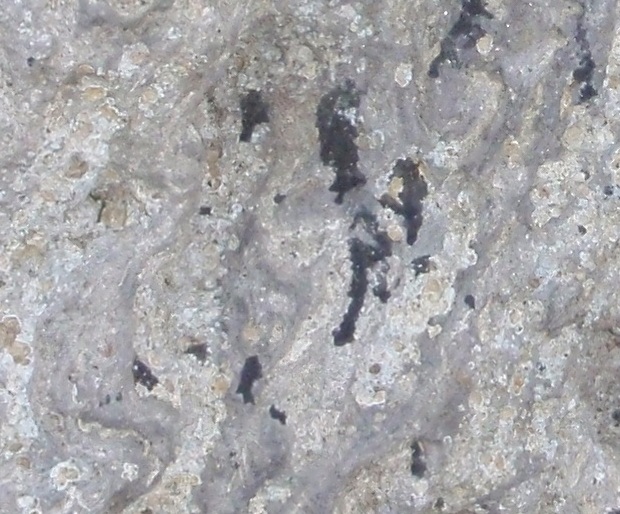

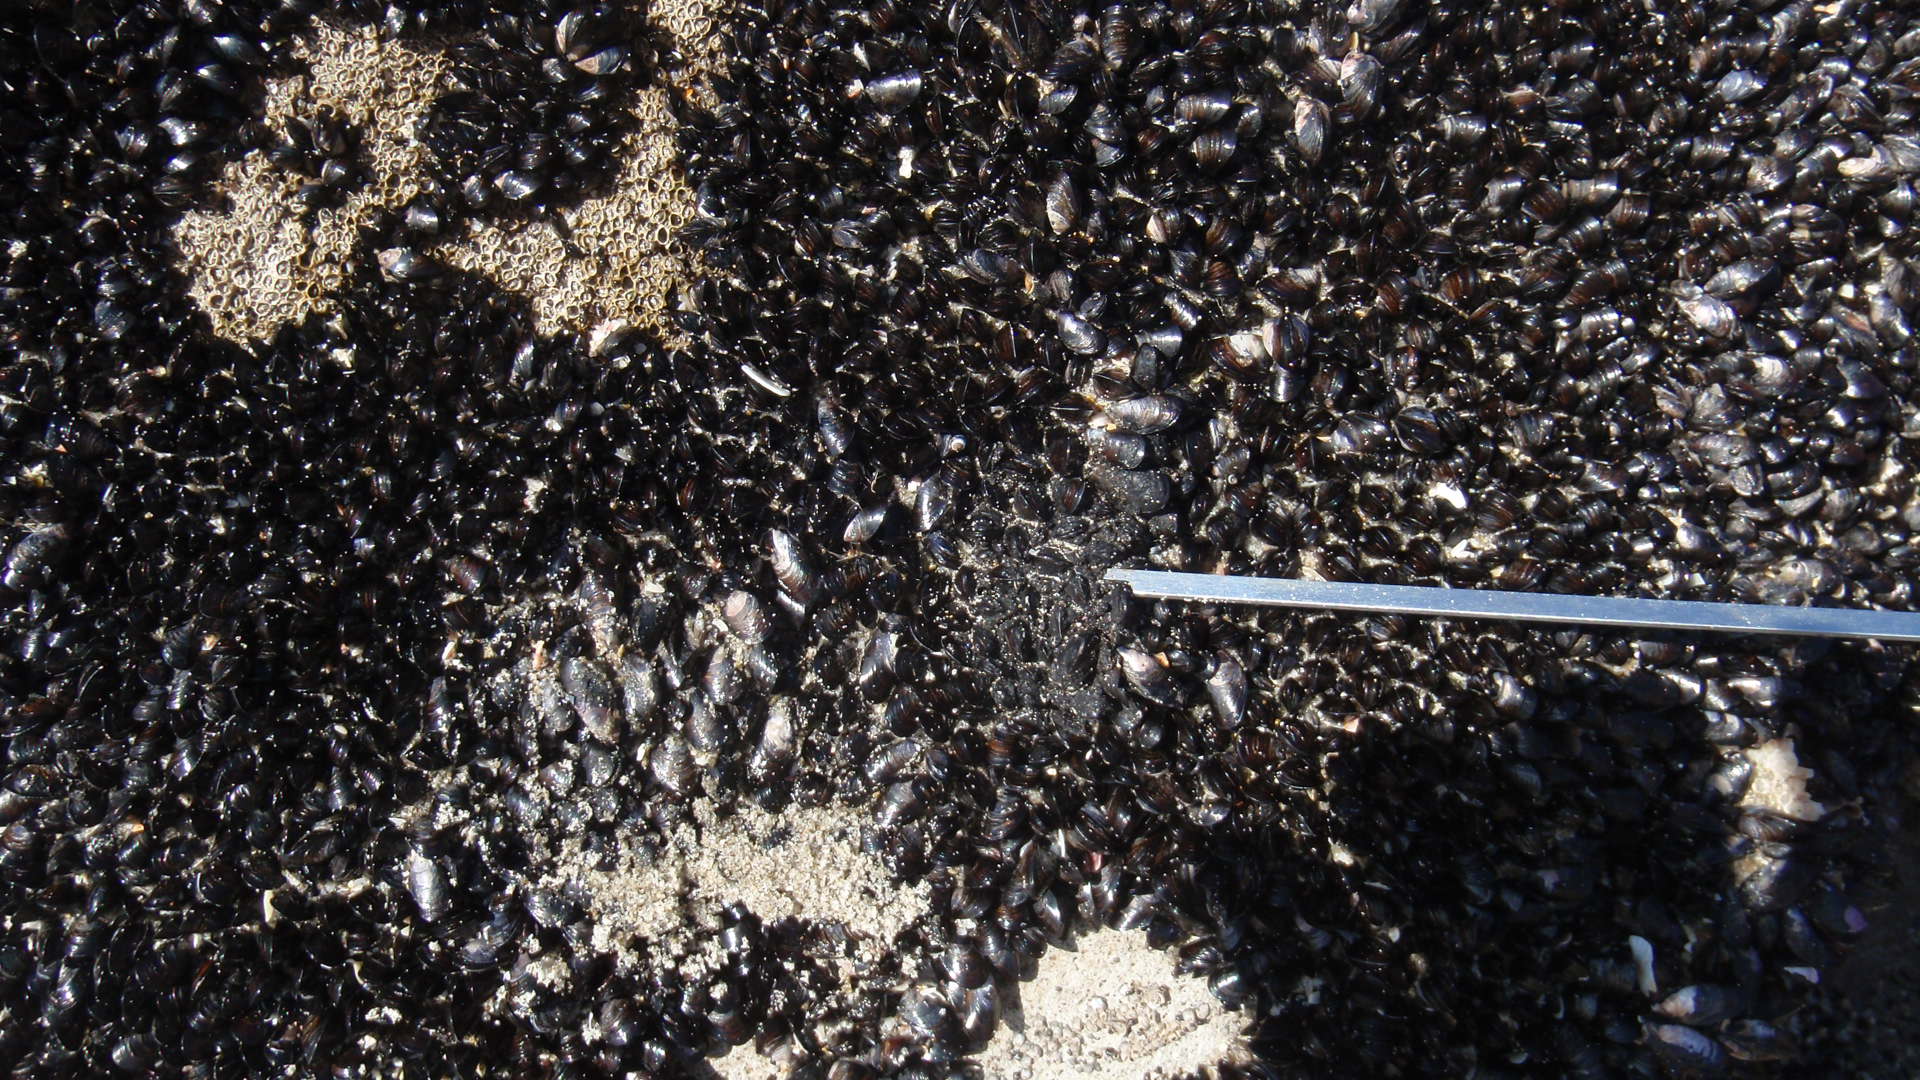

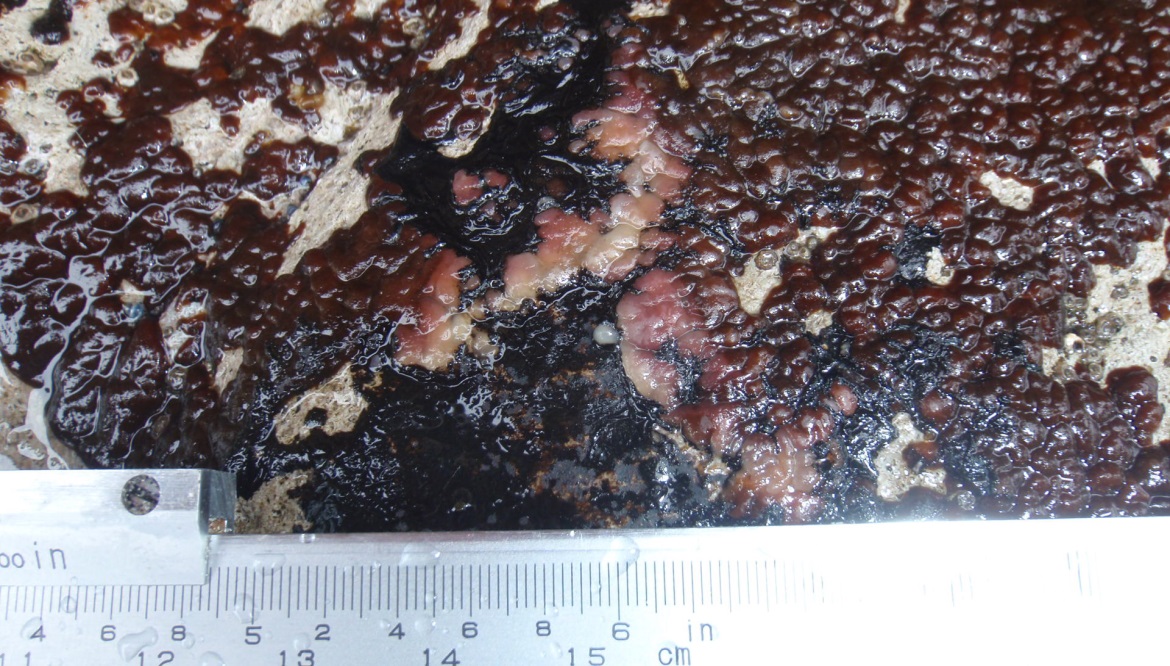


**Figure S3.** Clockwise from top left: oil patches on *Chamaesipho columna*, bare rock, *Limnoperna pulex* and the red alga *Apophlaea sinclairii*.
